CORRECTION

# Correction: Negligible Immunogenicity of Induced Pluripotent Stem Cells Derived from Human Skin Fibroblasts

The *PLOS ONE* Staff

The following information is missing from the Funding statement: Area of Excellence program (AoE/M-12/06), University Grants Committee of Hong Kong Special Administrative Region.

The complete, correct Funding statement is as follows: This work was supported in part by the grants from National Natural Science Foundation of China (NSFC) and the Research Grants Council (RGC) of Hong Kong Joint Research Scheme (N\_HKU 747/11), National Natural Science Foundation of China (No. 81170606); Area of Excellence program (AoE/M-12/06), University Grants Committee of Hong Kong Special Administrative Region, and Doctoral Fund of Ministry of Education of China (No. 20120181110087). The funders had no role in study design, data collection and analysis, decision to publish, or preparation of the manuscript.

## Reference

1. Lu Q, Yu M, Shen C, Chen X, Feng T, Yao Y, et al. (2014) Negligible Immunogenicity of Induced Pluripotent Stem Cells Derived from Human Skin Fibroblasts. *PLoS ONE* 9(12): e114949. doi: [10.1371/journal.pone.0114949](https://doi.org/10.1371/journal.pone.0114949) PMID: [25503995](https://pubmed.ncbi.nlm.nih.gov/25503995/)

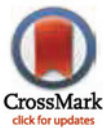

## OPEN ACCESS

**Citation:** The *PLOS ONE* Staff (2015) Correction: Negligible Immunogenicity of Induced Pluripotent Stem Cells Derived from Human Skin Fibroblasts. *PLoS ONE* 10(3): e0120834. doi:10.1371/journal.pone.0120834

**Published:** March 5, 2015

**Copyright:** © 2015 The PLOS ONE Staff. This is an open access article distributed under the terms of the [Creative Commons Attribution License](https://creativecommons.org/licenses/by/4.0/), which permits unrestricted use, distribution, and reproduction in any medium, provided the original author and source are credited.
